# Supplementary material for: Food product health warnings promote dietary self-control through reductions in neural signals indexing food cue reactivity
Source: PubMed Central journal article supplement — Neuroimage Clin. 2018 Mar 7;18:702–12. doi: 10.1016/j.nicl.2018.03.004 (PMC5859581; doi:10.1016/j.nicl.2018.03.004), 2018-03-07
Supplement: mmc1.pdf [file mmc1.pdf]

## Supplementary Materials

### **Food product health warnings promote dietary self-control through reductions in neural signals indexing food cue reactivity.**

Daniel H Rosenblatt<sup>1,2\*</sup>, Patrick Summerell<sup>1</sup>, Alyssa Ng<sup>1</sup>, Helen Dixon<sup>2</sup>, Carsten  
Murawski<sup>3</sup>, Melanie Wakefield<sup>2</sup>, Stefan Bode<sup>1,4</sup>

<sup>1</sup>Melbourne School of Psychological Sciences, The University of Melbourne, Victoria, Australia

<sup>2</sup>Centre for Behavioural Research in Cancer, Cancer Council Victoria, Victoria, Australia

<sup>3</sup>Department of Finance, The University of Melbourne, Victoria, Australia

<sup>4</sup>Department of Psychology, University of Cologne, Germany

### **EEG electrode array recording locations.**

The electroencephalogram was recorded from 64 active Ag/AgCl scalp electrodes placed according to the international 10-20 system in the following locations: Fp1, Fpz, Fp2, AF7, AF3, AFz, AF4, AF8, F7, F5, F3, F1, Fz, F2, F4, F6, F8, FT7, FC5, FC3, FC1, FCz, FC2, FC4, FC6, FT8, T7, C5, C3, C1, Cz, C2, C4, C6, T8, TP7, CP5, CP3, CP1, CPz, CP2, CP4, CP6, TP8, P9, P7, P5, P3, P1, Pz, P2, P4, P6, P8, P10, PO7, PO3, POz, PO4, PO8, O1, Oz, O2, Iz.

## Sample demographics and dietary behaviour.

Table S1

*Descriptive statistics for sample demographics and dietary behaviour variables.*

|                                                 | <b>Total Sample<br/>(N = 79)</b> | <b>HW Group<br/>(n = 52)</b> | <b>Control<br/>(n = 27)</b> | <b>t(77)</b>                     | <b>p</b> |
|-------------------------------------------------|----------------------------------|------------------------------|-----------------------------|----------------------------------|----------|
|                                                 | <b>Mean (SE<sup>a</sup>)</b>     | <b>Mean (SE)</b>             | <b>Mean (SE)</b>            |                                  |          |
| <b>Age</b>                                      | 22.9 (0.6)                       | 23.2 (0.82)                  | 22.37 (0.75)                | 0.65                             | 0.517    |
| <b>Body mass index (kg/m<sup>2</sup>)</b>       | 21.66 (0.37)                     | 21.96 (0.5)                  | 21.06 (0.45)                | 1.17                             | 0.246    |
| <b>Hours fasted</b>                             | 6.82 (0.52)                      | 6.83 (0.66)                  | 6.81 (0.86)                 | 0.01                             | 0.991    |
| <b>Initial hunger rating (1-8)</b>              | 4.65 (0.19)                      | 4.73 (0.25)                  | 4.48 (0.31)                 | 0.61                             | 0.546    |
| <b>Emotional eating (1-5; DEBQ<sup>b</sup>)</b> | 2.52 (0.1)                       | 2.59 (0.13)                  | 2.37 (0.16)                 | 1.09                             | 0.282    |
| <b>Restrained eating (1-5; DEBQ)</b>            | 2.34 (0.08)                      | 2.43 (0.1)                   | 2.19 (0.13)                 | 1.44                             | 0.155    |
| <b>External eating (1-5; DEBQ)</b>              | 3.36 (0.08)                      | 3.32 (0.1)                   | 3.47 (0.13)                 | 0.94                             | 0.352    |
|                                                 | <b>N (%)</b>                     | <b>n (%)</b>                 | <b>n (%)</b>                | <b><math>\chi^2_{(1)}</math></b> | <b>p</b> |
| <b>Sex</b>                                      |                                  |                              |                             |                                  |          |
| <b>Female</b>                                   | 52 (65.82)                       | 34 (65.38)                   | 18 (66.66)                  | < 0.001                          | 1        |
| <b>Male</b>                                     | 27 (34.18)                       | 18 (34.62)                   | 9 (33.33)                   |                                  |          |
| <b>Vegetable consumption</b>                    | <b>N (%)</b>                     | <b>n (%)</b>                 | <b>n (%)</b>                | <b>U</b>                         | <b>p</b> |
| <b>≤ 2 serves per day</b>                       | 26 (32.91)                       | 16 (30.77)                   | 10 (37.04)                  | 613                              | 0.331    |
| <b>3 serves per day</b>                         | 29 (36.71)                       | 18 (34.62)                   | 11 (40.74)                  |                                  |          |
| <b>≥ 4 serves per day</b>                       | 24 (30.38)                       | 18 (34.62)                   | 6 (22.22)                   |                                  |          |
| <b>Fruit consumption</b>                        |                                  |                              |                             |                                  |          |
| <b>≤ 1 serve per day</b>                        | 37 (46.84)                       | 29 (55.77)                   | 10 (37.04)                  | 840                              | 0.121    |
| <b>2 serves per day</b>                         | 22 (27.85)                       | 13 (25)                      | 9 (33.33)                   |                                  |          |
| <b>≥ 3 serves per day</b>                       | 20 (25.32)                       | 10 (19.23)                   | 8 (29.63)                   |                                  |          |
| <b>Sugar sweetened beverage consumption</b>     |                                  |                              |                             |                                  |          |
| <b>Do not drink</b>                             | 29 (36.71)                       | 18 (34.62)                   | 11 (40.74)                  | 707                              | 0.96     |
| <b>&lt; 1 cup per week</b>                      | 31 (39.24)                       | 23 (44.23)                   | 8 (29.63)                   |                                  |          |
| <b>≥ 1 cups per week</b>                        | 19 (24.05)                       | 11 (21.15)                   | 8 (29.63)                   |                                  |          |
| <b>Confectionary consumption</b>                |                                  |                              |                             |                                  |          |
| <b>&lt; 1 time per week</b>                     | 14 (17.72)                       | 10 (19.23)                   | 4 (14.81)                   | 752                              | 0.56     |
| <b>1 – 2 times per week</b>                     | 33 (41.77)                       | 22 (42.31)                   | 11 (40.74)                  |                                  |          |
| <b>3 – 4 times per week</b>                     | 20 (25.32)                       | 13 (25)                      | 7 (25.93)                   |                                  |          |
| <b>≥ 5 times per week</b>                       | 12 (15.19)                       | 7 (13.46)                    | 5 (18.51)                   |                                  |          |

<sup>a</sup> SE = Standard error. <sup>b</sup> DEBQ = Dutch Eating Behavior Questionnaire (van Strien et al., 1986).
